# Supplementary material for: Liverworts of the South Kamchatka Nature Park: Survival in Active Volcanism Land
Source: MDPI journal article supplement (doi:10.3390/d14090722), 2022-09-01
Supplement: s1 [file s1]

This document certifies that the manuscript

**Liverworts of the South Kamchatka Nature Park: survived in the active volcanism land**

prepared by the authors

**Vadim A. Bakalin<sup>1</sup>, Ksenia G. Klimova<sup>1</sup>, Eugeny A. Karpov<sup>2</sup>, Daniil A. Bakalin<sup>3</sup>, Seung Se Choi<sup>4</sup>**

was edited for proper English language, grammar, punctuation, spelling, and overall style by one or more of the highly qualified native English speaking editors at AJE.

This certificate was issued on **July 19, 2022** and may be verified on the [AJE website](https://aje.com) using the verification code **D4B0-3AAC-3A2D-9DB1-1C61**.

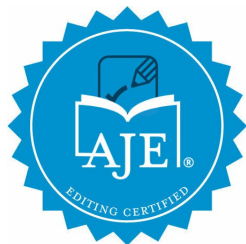

Neither the research content nor the authors' intentions were altered in any way during the editing process. Documents receiving this certification should be English-ready for publication; however, the author has the ability to accept or reject our suggestions and changes. To verify the final AJE edited version, please visit our verification page at [aje.com/certificate](https://aje.com/certificate). If you have any questions or concerns about this edited document, please contact AJE at [support@aje.com](mailto:support@aje.com).
