# Supplementary material for: Liverworts of the South Kamchatka Nature Park: Survival in Active Volcanism Land
Source: MDPI journal article supplement (doi:10.3390/d14090722), 2022-09-01
Supplement: s1 [file s1]

Archive with 2 entries (2 files):
- For the journal/Editing Certificate.pdf
- For the journal/Table S1.xlsx
