# Supplementary material for: Liverworts of the South Kamchatka Nature Park: Survival in Active Volcanism Land
Source: MDPI journal article supplement (doi:10.3390/d14090722), 2022-09-01
Supplement: s1 [file s1 › For the journal/Table S1.xlsx]

## Sheet: Table S1
Table S1
	Locality name	Latitude	Longitude	Elevation above sea level, m	BIO1	BIO2	BIO3	BIO4	BIO5	BIO6	BIO7	BIO8	BIO9	BIO10	BIO11	BIO12	BIO13	BIO14	BIO15	BIO16	BIO17	BIO18	BIO19
1	Middle course of Zhyoltaya River	51.576135999999998	157.462232999999998	112	1.79583	7.37500	28.04183	704.44840	15.20000	-11.10000	26.30000	8.60000	2.43333	11.08333	-6.16667	904.00000	131.00000	49.00000	32.55918	323.00000	152.00000	259.00000	189.00000
2	South peak of Zheltovskaya Sopka Volcano	51.576324999999997	157.328428000000002	1963	-4.83333	12.15000	41.18644	612.78921	10.10000	-19.40000	29.50000	1.73333	-8.88333	3.53333	-11.65000	1169.00000	159.00000	70.00000	27.92590	407.00000	222.00000	353.00000	233.00000
3	East slope of Zheltovskaya Sopka Volcano	51.571427999999997	157.349063999999998	1243	-2.65833	10.80000	38.43416	641.46790	11.50000	-16.60000	28.10000	3.91667	-2.86667	6.01667	-9.83333	1113.00000	161.00000	64.00000	30.40936	394.00000	202.00000	325.00000	226.00000
4	Middle course of Ilyinskaya River	51.501547000000002	157.433825000000013	35	2.11667	6.40000	25.39683	695.99286	15.30000	-9.90000	25.20000	8.73333	2.96667	11.18333	-5.70000	895.00000	128.00000	45.00000	32.84897	319.00000	146.00000	258.00000	189.00000
5	Ksudach Mountains (volcanic caldera Ksudach), Klyuchevoe lake western coast surroundings	51.797435999999998	157.510471999999993	588	-0.89167	9.00000	30.71672	763.50221	13.60000	-15.70000	29.30000	6.35000	0.05000	9.18333	-9.78333	990.00000	145.00000	55.00000	31.86005	358.00000	176.00000	290.00000	203.00000
6	Ksudach Mountains (volcanic caldera Ksudach), its eastern flank	51.800044000000000	157.474547000000001	928	-1.51250	9.85833	33.76142	727.48048	12.80000	-16.40000	29.20000	5.60000	-5.33333	8.11667	-9.86667	1037.00000	154.00000	59.00000	32.57723	378.00000	188.00000	306.00000	205.00000
7	Pravaya Khodutka River upper course	52.107582999999998	157.658749999999998	242	-0.15417	8.90833	28.64416	846.99323	15.50000	-15.60000	31.10000	7.45000	1.93333	10.58333	-9.80000	929.00000	142.00000	51.00000	36.10386	352.00000	160.00000	281.00000	179.00000
8	Saddle between Khodutka and Priyomysh volcanoes	52.080916999999999	157.689861000000008	1001	-2.71250	11.24167	34.27337	791.30539	13.60000	-19.20000	32.80000	4.40000	-6.63333	7.65000	-11.53333	1040.00000	154.00000	61.00000	32.75223	382.00000	185.00000	313.00000	201.00000
9	Crater rim of Khodutka Volcano	52.067943999999997	157.704138999999998	1813	-4.09167	13.10000	38.98809	726.31960	12.90000	-20.70000	33.60000	2.55000	-8.46667	5.68333	-11.91667	1101.00000	154.00000	66.00000	29.79448	393.00000	200.00000	335.00000	214.00000
10	Priyomysh Volcano, area near the peak	52.085138999999998	157.688110999999992	1213	-2.62500	11.20000	34.35583	789.64751	13.60000	-19.00000	32.60000	4.48333	-6.48333	7.71667	-11.45000	1019.00000	148.00000	58.00000	32.00808	371.00000	181.00000	306.00000	200.00000
11	Asacha River lower course, its left bank	52.189805999999997	157.209332999999987	17	-0.45000	9.31667	31.15942	787.43254	13.80000	-16.10000	29.90000	7.03333	-3.78333	9.46667	-9.58333	954.00000	142.00000	50.00000	37.62486	367.00000	156.00000	301.00000	172.00000
12	Mutnovskaya Sopka Volcano surroundings, foot of northern slope of the volcano, watershed between Osvistannaya and Falshivaya Rivers	52.496443999999997	157.160832999999997	1182	-0.69167	9.75000	32.28477	793.04601	14.40000	-15.80000	30.20000	6.75000	-7.70000	9.21667	-9.76667	930.00000	140.00000	46.00000	39.77335	362.00000	144.00000	300.00000	160.00000
13	Mutnovskaya Sopka Volcano surroundings, foot of northern slope of the volcano, watershed between Osvistannaya and Falshivaya Rivers, Otkhodyashchiy Range, 'Zhandarm' outlier	52.485300000000002	157.159788999999989	1595	-0.62917	9.75833	32.41971	787.81763	14.40000	-15.70000	30.10000	6.78333	-7.60000	9.23333	-9.63333	924.00000	138.00000	46.00000	39.74547	360.00000	143.00000	301.00000	158.00000
14	Mutnovskaya Sopka Volcano surroundings, foot of northern slope of the volcano, Falshivaya Rivers upper course	52.535418999999997	157.197927999999990	784	-1.35000	10.35000	32.96178	820.38517	14.30000	-17.10000	31.40000	6.20000	-4.75000	8.93333	-10.78333	921.00000	137.00000	46.00000	39.03518	355.00000	141.00000	296.00000	161.00000
BIO1 = Annual Mean Temperature
BIO2 = Mean Diurnal Range (Mean of monthly (max temp - min temp))
BIO3 = Isothermality (BIO2/BIO7) (×100)
BIO4 = Temperature Seasonality (standard deviation ×100)
BIO5 = Max Temperature of Warmest Month
BIO6 = Min Temperature of Coldest Month
BIO7 = Temperature Annual Range (BIO5-BIO6)
BIO8 = Mean Temperature of Wettest Quarter
BIO9 = Mean Temperature of Driest Quarter
BIO10 = Mean Temperature of Warmest Quarter
BIO11 = Mean Temperature of Coldest Quarter
BIO12 = Annual Precipitation
BIO13 = Precipitation of Wettest Month
BIO14 = Precipitation of Driest Month
BIO15 = Precipitation Seasonality (Coefficient of Variation)
BIO16 = Precipitation of Wettest Quarter
BIO17 = Precipitation of Driest Quarter
BIO18 = Precipitation of Warmest Quarter
BIO19 = Precipitation of Coldest Quarter
